# Supplementary material for: Practice variations in the management of childhood nephrotic syndrome in the Netherlands
Source: PubMed Central journal article supplement (PMC8105198; doi:10.1007/s00431-021-03958-8), 2021-02-03
Supplement: 431_2021_3958_MOESM1_ESM.pdf [file 431_2021_3958_MOESM1_ESM.pdf]

## Supplementary Information

Practice variations in the management of childhood nephrotic syndrome in the Netherlands

Anne M. Schijvens, MD<sup>1</sup>, Lucie van der Weerd, BSc<sup>1\*</sup>, Joanna A.E. van Wijk, MD PhD<sup>2</sup>, Antonia H.M. Bouts, MD PhD<sup>3</sup>, Mandy Keijzer-Veen, MD PhD<sup>4</sup>, Eiske M. Dorresteijn, MD<sup>5</sup>, Michiel F. Schreuder, MD PhD<sup>1</sup>.

<sup>1</sup>Radboud university medical center, Radboud Institute for Molecular Life Sciences, Amalia Children's Hospital, Department of Pediatric Nephrology, Nijmegen, The Netherlands

<sup>2</sup>Amsterdam UMC, Vrije Universiteit Amsterdam, Department of Pediatric Nephrology, Amsterdam, The Netherlands

<sup>3</sup>Amsterdam UMC, University of Amsterdam, Emma Children's Hospital, Department of Pediatric Nephrology, Amsterdam, The Netherlands

<sup>4</sup>University Medical Center Utrecht, Wilhelmina Children's Hospital, Department of Pediatric Nephrology, Utrecht, The Netherlands

<sup>5</sup>Erasmus MC - Sophia Children's Hospital, Department of Pediatric Nephrology, Rotterdam, The Netherlands

[Anne.schijvens@radboudumc.nl](mailto:Anne.schijvens@radboudumc.nl)

Journal: European Journal of Pediatrics

### Table of contents

|          |                                                                                                                |
|----------|----------------------------------------------------------------------------------------------------------------|
| <b>1</b> | <b>Supplemental Table 1</b> Demographics of the respondents                                                    |
| <b>2</b> | <b>Supplemental Table 2</b> Factors associated with guideline adherence for several items of the questionnaire |

**Table 1** Demographics of the respondents

| <b>Characteristic</b>                                       | <b>Category</b>                                 | <b>N (%)<sup>a</sup></b> |
|-------------------------------------------------------------|-------------------------------------------------|--------------------------|
| Gender                                                      | Male                                            | 21 (41%)                 |
|                                                             | Female                                          | 30 (59%)                 |
| Age                                                         | <41 years                                       | 9 (18%)                  |
|                                                             | 41-50 years                                     | 22 (44%)                 |
|                                                             | 51-60 years                                     | 15 (30%)                 |
|                                                             | >60 years                                       | 4 (8%)                   |
| Profession                                                  | General pediatrician                            | 13 (26%)                 |
|                                                             | Pediatrician with focus on pediatric nephrology | 17 (33%)                 |
|                                                             | Pediatric nephrologist                          | 20 (39%)                 |
|                                                             | Pediatric nephrologist in training              | 1(2%)                    |
| Experience <sup>b</sup>                                     | 0-5 years                                       | 7 (19%)                  |
|                                                             | 5-10 years                                      | 8 (23%)                  |
|                                                             | 10-15 years                                     | 7 (19%)                  |
|                                                             | >15 years                                       | 14 (39%)                 |
| Clinical practice vs other responsibilities (e.g. research) | <50% clinical work                              | 2 (4%)                   |
|                                                             | 50% clinical work                               | 5 (10%)                  |
|                                                             | >50% clinical work                              | 44 (86%)                 |
| Institution                                                 | Academic hospital                               | 18 (35%)                 |
|                                                             | General hospital                                | 33 (65%)                 |

<sup>a</sup>Some respondents did not answer all questions, therefore the number (N) does not always add up to N=51

<sup>b</sup>Information only available for pediatric nephrologists (in training) and pediatricians with focus on pediatric nephrology

**Supplemental Table 1.** Factors associated with guideline adherence for several items of the questionnaire

| Characteristic                                                       | Category               | Dutch guideline adherence % (n) | p-value | KDIGO guideline adherence % (n) | p-value |
|----------------------------------------------------------------------|------------------------|---------------------------------|---------|---------------------------------|---------|
| <b>Tapering of steroids first presentation of nephrotic syndrome</b> |                        |                                 |         |                                 |         |
| Profession                                                           | Pediatrician           | 67% (20)                        | 0.26    | 33% (10)                        | 0.26    |
|                                                                      | Pediatric nephrologist | 81% (17)                        |         | 19% (4)                         |         |
| Age group                                                            | >48 years              | 75% (18)                        | 0.65    | 25% (6)                         | 0.65    |
|                                                                      | ≤48 years              | 69% (18)                        |         | 31% (8)                         |         |
| Clinical practice versus other responsibilities                      | >50% clinical work     | 73% (32)                        | 1.00    | 27% (12)                        | 1.00    |
|                                                                      | ≤50% clinical work     | 71% (5)                         |         | 29% (2)                         |         |
| Institution                                                          | Academic hospital      | 78% (14)                        | 0.74    | 22% (4)                         | 0.74    |
|                                                                      | General hospital       | 70% (23)                        |         | 30% (10)                        |         |
| <b>Steroid treatment relapse of nephrotic syndrome</b>               |                        |                                 |         |                                 |         |
| Profession                                                           | Pediatrician           | 58% (14)                        | 0.21    | 88% (21)                        | 1.00    |
|                                                                      | Pediatric nephrologist | 39% (7)                         |         | 89% (16)                        |         |
| Age group                                                            | >48 years              | 58% (11)                        | 0.43    | 84% (16)                        | 0.65    |
|                                                                      | ≤48 years              | 46% (10)                        |         | 91% (20)                        |         |
| Clinical practice versus other responsibilities                      | >50% clinical work     | 53% (19)                        | 0.66    | 89% (32)                        | 0.56    |
|                                                                      | ≤50% clinical work     | 33% (2)                         |         | 83% (5)                         |         |
| Institution                                                          | Academic hospital      | 38% (6)                         | 0.20    | 88% (14)                        | 1.00    |
|                                                                      | General hospital       | 58% (15)                        |         | 89% (23)                        |         |
| <b>Frequency of daily dosing</b>                                     |                        |                                 |         |                                 |         |
| Profession                                                           | Pediatrician           | 100% (30)                       | NA      | 60% (18)                        | 0.14    |
|                                                                      | Pediatric nephrologist | 100% (20)                       |         | 80% (16)                        |         |
| Age group                                                            | >48 years              | 100% (24)                       | NA      | 63% (15)                        | 0.31    |
|                                                                      | ≤48 years              | 100% (25)                       |         | 76% (19)                        |         |
| Clinical practice versus other responsibilities                      | >50% clinical work     | 100% (43)                       | NA      | 72% (31)                        | 0.19    |
|                                                                      | ≤50% clinical work     | 100% (7)                        |         | 43% (3)                         |         |
| Institution                                                          | Academic hospital      | 100% (18)                       | NA      | 83% (15)                        | 0.08    |
|                                                                      | General hospital       | 100% (32)                       |         | 59% (19)                        |         |
| <b>Maximum daily dose</b>                                            |                        |                                 |         |                                 |         |
| Profession                                                           | Pediatrician           | 83% (19)                        | 1.00    | 13% (3)                         | 1.00    |
|                                                                      | Pediatric nephrologist | 83% (15)                        |         | 17% (3)                         |         |
| Age group                                                            | >48 years              | 90% (17)                        | 0.41    | 5% (1)                          | 0.19    |
|                                                                      | ≤48 years              | 76% (16)                        |         | 24% (5)                         |         |
| Clinical practice versus other responsibilities                      | >50% clinical work     | 86% (30)                        | 0.29    | 11% (4)                         | 0.21    |
|                                                                      | ≤50% clinical work     | 67% (4)                         |         | 33% (2)                         |         |
| Institution                                                          | Academic hospital      | 81% (13)                        | 1.00    | 19% (3)                         | 0.66    |
|                                                                      | General hospital       | 84% (21)                        |         | 12% (3)                         |         |
| <b>Maximum alternate day dose</b>                                    |                        |                                 |         |                                 |         |
| Profession                                                           | Pediatrician           | ND                              | ND      | 9% (2)                          | 1.00    |
|                                                                      | Pediatric nephrologist | ND                              |         | 12% (2)                         |         |
| Age group                                                            | >48 years              | ND                              | ND      | 6% (1)                          | 0.61    |
|                                                                      | ≤48 years              | ND                              |         | 14% (3)                         |         |
| Clinical practice versus other responsibilities                      | >50% clinical work     | ND                              | ND      | 9% (3)                          | 0.49    |
|                                                                      | ≤50% clinical work     | ND                              |         | 17% (1)                         |         |
| Institution                                                          | Academic hospital      | ND                              | ND      | 7% (1)                          | 1.00    |
|                                                                      | General hospital       | ND                              |         | 12% (3)                         |         |
| <b>Definition steroid resistant nephrotic syndrome</b>               |                        |                                 |         |                                 |         |
| Profession                                                           | Pediatrician           | 64% (7)                         | 0.18    | 9% (1)                          | 0.62    |
|                                                                      | Pediatric nephrologist | 38% (6)                         |         | 25% (4)                         |         |
| Age group                                                            | >48 years              | 54% (7)                         | 0.70    | 15% (4)                         | 1.00    |
|                                                                      | ≤48 years              | 46% (6)                         |         | 15% (2)                         |         |
| Clinical practice versus other responsibilities                      | >50% clinical work     | 55% (12)                        | 0.33    | 23% (5)                         | 0.55    |
|                                                                      | ≤50% clinical work     | 20% (1)                         |         | 0% (0)                          |         |

|                                                                         |                        |         |      |         |      |
|-------------------------------------------------------------------------|------------------------|---------|------|---------|------|
| Institution                                                             | Academic hospital      | 36% (5) | 0.18 | 21% (4) | 1.00 |
|                                                                         | General hospital       | 62% (8) |      | 15% (2) |      |
| <b>RAAS inhibition in steroid resistant nephrotic syndrome patients</b> |                        |         |      |         |      |
| Profession                                                              | Pediatrician           | ND      | ND   | 31% (4) | 0.39 |
|                                                                         | Pediatric nephrologist | ND      |      | 47% (7) |      |
| Age group                                                               | >48 years              | ND      | ND   | 36% (4) | 1.00 |
|                                                                         | ≤48 years              | ND      |      | 44% (7) |      |
| Clinical practice versus other responsibilities                         | >50% clinical work     | ND      | ND   | 33% (8) | 0.27 |
|                                                                         | ≤50% clinical work     | ND      |      | 75% (3) |      |
| Institution                                                             | Academic hospital      | ND      | ND   | 46% (6) | 0.49 |
|                                                                         | General hospital       | ND      |      | 33% (5) |      |

NA, not applicable; ND, no data (no recommendation available in the guideline); RAAS, renin-angiotensin-aldosterone system
